# Supplementary material for: Functional Activation-Informed Structural Changes during Stroke Recovery: A Longitudinal MRI Study
Source: Hindawi journal article supplement (doi:10.1155/2017/4345205), 2017-01-01
Supplement: f1 [file 4345205.f1.pdf]

## Supplementary Materials

Table S1. Subject-wise values for  $aGMV$ ,  $aGMV_i$  and  $aGMV_c$ ,  $LI_{gmv}$ ,  $N$ ,  $N_i$ ,  $N_c$ , and  $LI_N$

| Subject No. | Time point | $aGMV$   | $aGMV_i$ | $aGMV_c$ | $LI_{gmv}$ | $N$  | $N_i$ | $N_c$ | $LI_N$   |
|-------------|------------|----------|----------|----------|------------|------|-------|-------|----------|
| 1           | 1          | 0.31067  | 0.273321 | 0.345733 | 0.116972   | 914  | 475   | 439   | -0.03939 |
|             | 2          | 0.286923 | 0.275465 | 0.307305 | 0.054636   | 928  | 666   | 262   | -0.43534 |
|             | 3          | N/A      | N/A      | N/A      | N/A        | N/A  | N/A   | N/A   | N/A      |
|             | 4          | N/A      | N/A      | N/A      | N/A        | N/A  | N/A   | N/A   | N/A      |
| 2           | 1          | 0.368311 | 0.340946 | 0.409951 | 0.091897   | 1072 | 767   | 305   | -0.43097 |
|             | 2          | 0.309781 | 0.218848 | 0.395549 | 0.2876     | 907  | 451   | 456   | 0.005513 |
|             | 3          | N/A      | N/A      | N/A      | N/A        | N/A  | N/A   | N/A   | N/A      |
|             | 4          | N/A      | N/A      | N/A      | N/A        | N/A  | N/A   | N/A   | N/A      |
| 3           | 1          | 0.284929 | 0.270376 | 0.310887 | 0.069694   | 1020 | 567   | 453   | -0.11176 |
|             | 2          | 0.354765 | 0.457781 | 0.282212 | -0.23726   | 1204 | 495   | 709   | 0.177741 |
|             | 3          | N/A      | N/A      | N/A      | N/A        | N/A  | N/A   | N/A   | N/A      |
|             | 4          | N/A      | N/A      | N/A      | N/A        | N/A  | N/A   | N/A   | N/A      |
| 4           | 1          | 0.314618 | 0.23314  | 0.3856   | 0.246405   | 1152 | 524   | 628   | 0.090278 |
|             | 2          | N/A      | N/A      | N/A      | N/A        | N/A  | N/A   | N/A   | N/A      |
|             | 3          | N/A      | N/A      | N/A      | N/A        | N/A  | N/A   | N/A   | N/A      |
|             | 4          | N/A      | N/A      | N/A      | N/A        | N/A  | N/A   | N/A   | N/A      |
| 5           | 1          | 0.443945 | 0.38628  | 0.512367 | 0.140307   | 1072 | 584   | 488   | -0.08955 |
|             | 2          | N/A      | N/A      | N/A      | N/A        | N/A  | N/A   | N/A   | N/A      |
|             | 3          | 0.374363 | 0.360334 | 0.456782 | 0.118035   | 1115 | 990   | 125   | -0.77578 |
|             | 4          | 0.439992 | 0.474776 | 0.42487  | -0.05547   | 1062 | 327   | 735   | 0.384181 |
| 6           | 1          | 0.255153 | 0.23922  | 0.317306 | 0.14031    | 882  | 706   | 176   | -0.60091 |
|             | 2          | 0.326591 | 0.288759 | 0.481291 | 0.250025   | 1213 | 970   | 243   | -0.59934 |
|             | 3          | 0.334255 | 0.260934 | 0.440542 | 0.256043   | 945  | 575   | 370   | -0.21693 |
|             | 4          | 0.282113 | 0.256857 | 0.394526 | 0.211349   | 913  | 743   | 170   | -0.6276  |
| 7           | 1          | 0.406528 | 0.379546 | 0.426963 | 0.058792   | 1131 | 417   | 714   | 0.262599 |
|             | 2          | 0.515092 | 0.487551 | 0.570171 | 0.078112   | 979  | 676   | 303   | -0.381   |
|             | 3          | 0.400028 | 0.353699 | 0.449741 | 0.119538   | 1231 | 623   | 608   | -0.01219 |
|             | 4          | 0.409441 | 0.31718  | 0.605127 | 0.312203   | 966  | 653   | 313   | -0.35197 |
| 8           | 1          | 0.28323  | 0.280015 | 0.282402 | 0.004244   | 1104 | 792   | 312   | -0.43478 |
|             | 2          | 0.331834 | 0.328376 | 0.343742 | 0.022862   | 1217 | 660   | 557   | -0.08463 |
|             | 3          | 0.286483 | 0.220378 | 0.371675 | 0.255546   | 999  | 603   | 396   | -0.20721 |
|             | 4          | 0.260932 | 0.209394 | 0.36838  | 0.275169   | 1133 | 818   | 315   | -0.44395 |
| 9           | 1          | 0.340598 | 0.310249 | 0.432552 | 0.164651   | 963  | 704   | 259   | -0.4621  |
|             | 2          | 0.271305 | 0.2593   | 0.35986  | 0.162413   | 814  | 725   | 89    | -0.78133 |
|             | 3          | 0.366202 | 0.301868 | 0.495547 | 0.242884   | 983  | 649   | 334   | -0.32045 |
|             | 4          | N/A      | N/A      | N/A      | N/A        | N/A  | N/A   | N/A   | N/A      |
| 10          | 1          | 0.28518  | 0.261404 | 0.309301 | 0.083925   | 946  | 441   | 505   | 0.067653 |
|             | 2          | 0.366976 | 0.329943 | 0.420364 | 0.120512   | 962  | 568   | 394   | -0.18087 |
|             | 3          | N/A      | N/A      | N/A      | N/A        | N/A  | N/A   | N/A   | N/A      |
|             | 4          | N/A      | N/A      | N/A      | N/A        | N/A  | N/A   | N/A   | N/A      |
| 11          | 1          | 0.390734 | 0.38955  | 0.39042  | 0.001116   | 1149 | 995   | 154   | -0.73194 |
|             | 2          | 0.376578 | 0.348033 | 0.417844 | 0.091152   | 1025 | 656   | 369   | -0.28    |
|             | 3          | 0.408622 | 0.402815 | 0.425347 | 0.027207   | 1035 | 775   | 260   | -0.49758 |
|             | 4          | 0.374606 | 0.336258 | 0.554005 | 0.244587   | 906  | 747   | 159   | -0.64901 |
| 12          | 1          | 0.335539 | 0.359307 | 0.324886 | -0.05031   | 1204 | 325   | 879   | 0.460133 |
|             | 2          | 0.297241 | 0.270979 | 0.389    | 0.178825   | 1138 | 885   | 253   | -0.55536 |
|             | 3          | 0.296044 | 0.253874 | 0.429855 | 0.257384   | 1138 | 861   | 277   | -0.51318 |
|             | 4          | 0.304847 | 0.292627 | 0.391697 | 0.144771   | 1172 | 1021  | 151   | -0.74232 |

N/A means the values are not available due to missing fMRI data at corresponding time points.

## Results on the first three time points

Analysis was performed for the data of the first three time points as well with the similar analysis method used for the data of all four time points. The dynamic changes of  $aGMV$ ,  $aGMV_c$ ,  $aGMV_i$ , and  $LI_{gmv}$  through three time points as well as their longitudinal relationships with FMI were examined by the linear mixed-effects model. Similar results were found for  $aGMV_c$  and  $LI_{gmv}$ , that is, their values increased significantly through the first three time points ( $aGMV_c$ :  $t = 2.3678$ ,  $p = 0.0308$ ;  $LI_{gmv}$ :  $t = 2.3990$ ,  $p = 0.0290$ ). For  $aGMV$  or  $aGMV_i$ , no significant dynamic changes were found through the first three time points, which was also similar with the results obtained from the data of all four time points. With respect to the longitudinal relationship of  $aGMV$ ,  $aGMV_c$ ,  $aGMV_i$ , and  $LI_{gmv}$  with FMI, no significant relationship was identified though the relationship between  $aGMV$  and FMI was close to significance ( $p = 0.0936$ ).

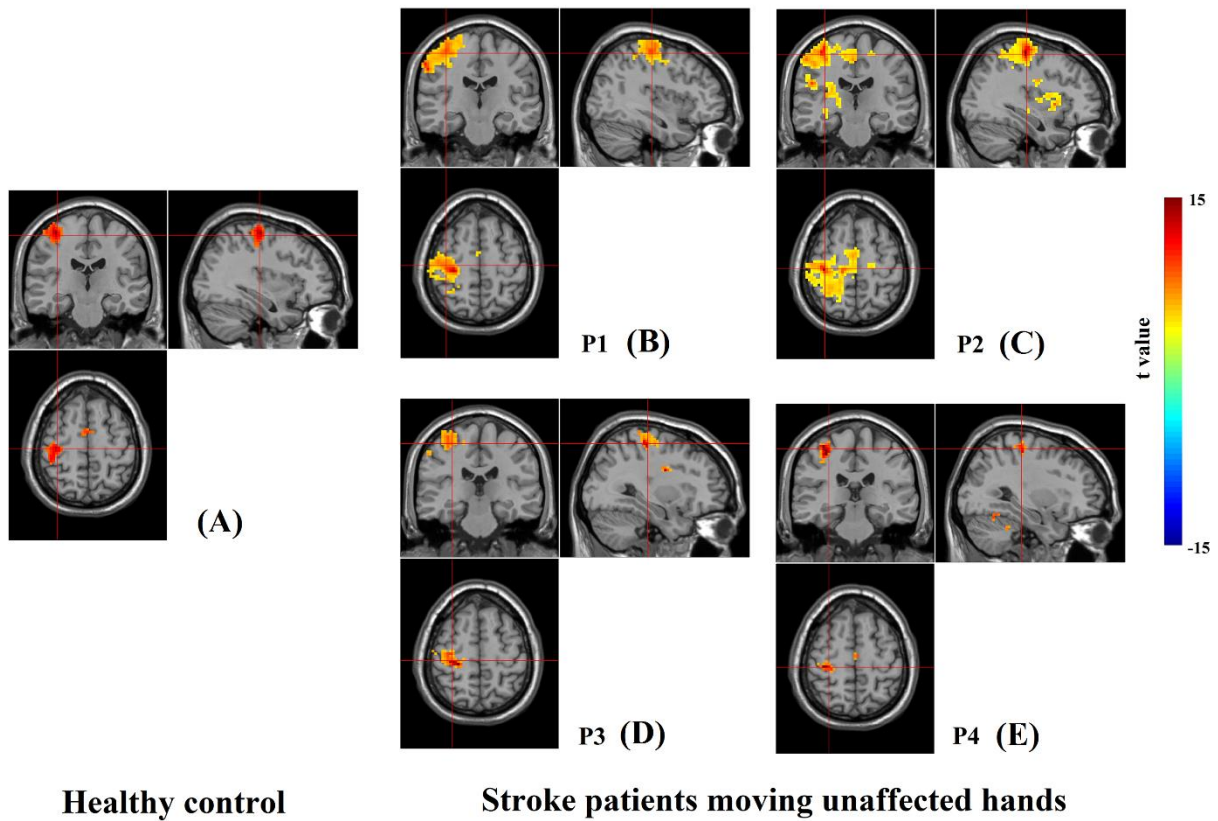

Fig. S1. The group-level activation map of healthy controls moving their right hands (A); The group-level activation map of stroke patients moving unaffected hands at P1 (B), P2 (C), P3 (D), and P4 (E). The threshold for activation was  $p < 0.001$ , cluster size  $> 13$  voxels.

## Dynamic change of FMI over time

The dynamic change of FMI over time was calculated using linear-mixed model, which is as follow:

$$F_{ij} = \mu + b_i + T_{ij}\beta_1 + \varepsilon_{ij}, \quad i = 1, 2, 3, \dots, K; \quad j = 1, 2, 3, 4,$$

where  $F_{ij}$  represents either the FMI of the  $i$ th subject from the  $j$ th scan (up to four scans in this study),  $\mu$  is the fixed effect term for all patients,  $b_i$  is the random effect term for each patient,  $T_{ij}$  represents the days post stroke and  $\beta_1$  is its scalar (the common slope),  $\varepsilon_{ij}$  represents the residual error of the model, and  $K$  is the number of patients.

The statistical results are listed in Table S2. The results showed that the FMI increased significantly across four time points ( $p < 0.0001$ ).

Table S2. Statistical Results of Linear Mixed-Effects Model for dynamic change of FMI over time

|           | Value  | Std. Error | DF | <i>t</i> -value | <i>p</i> -value |
|-----------|--------|------------|----|-----------------|-----------------|
| $\beta_1$ | 0.1207 | 0.0172     | 22 | 7.0337          | <0.0001         |
